# Supplementary material for: Development of a continuous flow synthesis of FGIN-1-27 enabled by in-line 19F NMR analyses and optimization algorithms
Source: Royal Society of Chemistry journal article supplement (doi:10.1039/d1re00220a), 2021-01-01
Supplement: d1re00220a1.pdf [file d1re00220a1.pdf]

# Electronic Supplementary Information

## Development of a Continuous Flow Synthesis of FGIN-1-27 Enabled by in-line $^{19}\text{F}$ NMR Analyses and Optimization Algorithms

N. Vasudevan,<sup>a</sup> Ehu C. Aka,<sup>a</sup> Elvina Barré,<sup>a</sup> Eric Wimmer,<sup>b</sup> Daniel Cortés-Borda,<sup>c</sup> Patrick Giraudeau,<sup>a</sup> Jonathan Farjon,<sup>a</sup> Mireia Rodriguez-Zubiri,<sup>a</sup> and François-Xavier Felpin<sup>a,\*</sup>

<sup>a</sup> Université de Nantes, CNRS, CEISAM UMR 6230, 2 rue de la Houssinière, 44322 Nantes, France.

<sup>b</sup> Institut de Recherches Servier, 125 Chemin de Ronde, 78290 Croissy sur Seine, France.

<sup>c</sup> Universidad del Atlántico, Facultad de ciencias básicas, Carrera 30 # 8-49, Puerto Colombia – Atlántico.

\* Corresponding author. Tel.: +33-025-112-5422; e-mail: [fx.felpin@univ-nantes.fr](mailto:fx.felpin@univ-nantes.fr); ORCID: 0000-0002-8851-246X; Website: <http://felpin.univ-nantes.fr/>

### Table of content

|                                                             |               |
|-------------------------------------------------------------|---------------|
| <b>1. General information</b>                               | <b>ESI-2</b>  |
| <b>2. Optimization algorithm</b>                            | <b>ESI-2</b>  |
| <b>3. Details of the experimental setup</b>                 | <b>ESI-2</b>  |
| <b>4. Optimization studies for the direct C-H arylation</b> | <b>ESI-3</b>  |
| a. Table S1                                                 | ESI-3         |
| b. Figure S1                                                | ESI-4         |
| <b>5. NMR Spectra</b>                                       | <b>ESI-5</b>  |
| <b>6. References</b>                                        | <b>ESI-10</b> |

## 1. General information

All commercially available chemicals were used as received unless otherwise noted. High-field  $^1\text{H}$  and  $^{13}\text{C}$  NMR spectra were recorded at 300 or 400 and 75 or 100 MHz, respectively.  $^1\text{H}$  and  $^{13}\text{C}$  NMR spectra were referenced to the residual signal of the internal deuterated solvent ( $\text{CDCl}_3$ ) at 7.26 and 77.16 ppm, respectively, and coupling constants were measured in Hertz.  $^{19}\text{F}$  spectra were recorded at 40.88 MHz with a 1T-benchtop spectrometer (Spinsolve, Magritek) equipped with a flow cell (4 mm id). The following abbreviations were used to explain the multiplicities: s = singlet, d = doublet, t = triplet, q = quartet, m = multiplet, br = broad. FT-IR spectra were recorded in the ATR mode. Wavelengths of maximum absorbance ( $\nu_{\text{max}}$ ) are quoted in wave numbers ( $\text{cm}^{-1}$ ). Flash column chromatography was performed using silica gel 60 (40–63  $\mu\text{m}$ ). In order to remove any trace of waste (Pd particles, inorganic salts...) which progressively deposits on the wall of the reactor coil, the tubing was washed every 100 hours of use with an aqueous solution of nitric acid (1M, 50 mL) followed by a thorough washing with water (100 mL) and  $\text{CH}_3\text{CN}$  (100 mL).

## 2. Optimization algorithm

The optimization algorithm here used has been described in our previous reports.<sup>1, 2</sup>

## 3. Details of the experimental setup

HPLC pumps (JASCO PU4185) were employed to flow the solution through the system. The reactor coil was heated with a heating plate (Heidolph, MR Hei-Connect). The reaction yields were determined by HPLC using the following method: Agela Promosil C18 column (3.5 mm  $\times$  150mm, 5  $\mu\text{m}$ ), solvent: MeOH/ $\text{H}_2\text{O}$  (70/30), isocratic mode, flow rate 0.5 mL/min, UV detection (254 nm).

#### 4. Optimization studies for the direct C-H arylation

**a. Table S1.** Maximization of the reaction yield of compound **6**

| Run | Diazonium<br>(equiv.) | Palladium<br>(mol%) | Residence<br>time<br>(min) | Temperature<br>(° C) | HPLC Yield<br>(%) |
|-----|-----------------------|---------------------|----------------------------|----------------------|-------------------|
| 1   | 1.0                   | 1.0                 | 10                         | 25                   | 0                 |
| 2   | 1.2                   | 1.0                 | 10                         | 25                   | 0                 |
| 3   | 1.0                   | 1.8                 | 10                         | 25                   | 0                 |
| 4   | 1.0                   | 1.0                 | 14                         | 25                   | 0                 |
| 5   | 1.0                   | 1.0                 | 10                         | 32                   | 0                 |
| 6   | 1.7                   | 4.0                 | 25                         | 39                   | 32                |
| 7   | 1.9                   | 4.0                 | 25                         | 39                   | 28                |
| 8   | 1.7                   | 4.8                 | 25                         | 39                   | 32                |
| 9   | 1.7                   | 4.0                 | 29                         | 39                   | 31                |
| 10  | 1.7                   | 4.0                 | 25                         | 46                   | 48                |
| 11  | 1.5                   | 4.4                 | 27                         | 43                   | 39                |
| 12  | 1.6                   | 4.6                 | 22                         | 44                   | 36                |
| 13  | 1.6                   | 4.9                 | 25                         | 47                   | 53                |
| 14  | 1.5                   | 5.0                 | 24                         | 48                   | 52                |
| 15  | 1.5                   | 4.2                 | 24                         | 51                   | 50                |
| 16  | 1.5                   | 4.1                 | 28                         | 49                   | 45                |
| 17  | 1.6                   | 4.2                 | 24                         | 54                   | 65                |
| 18  | 1.7                   | 4.1                 | 23                         | 59                   | 80                |
| 19  | 1.7                   | 4.4                 | 20                         | 53                   | 57                |
| 20  | 1.5                   | 4.8                 | 21                         | 59                   | 78                |
| 21  | 1.7                   | 5.0                 | 19                         | 58                   | 69                |
| 22  | 1.7                   | 4.5                 | 20                         | 60                   | 77                |
| 23  | 1.6                   | 4.6                 | 21                         | 60                   | 75                |

**b. Figure S1.** HPLC chromatogram of the crude mixture of experiment 18

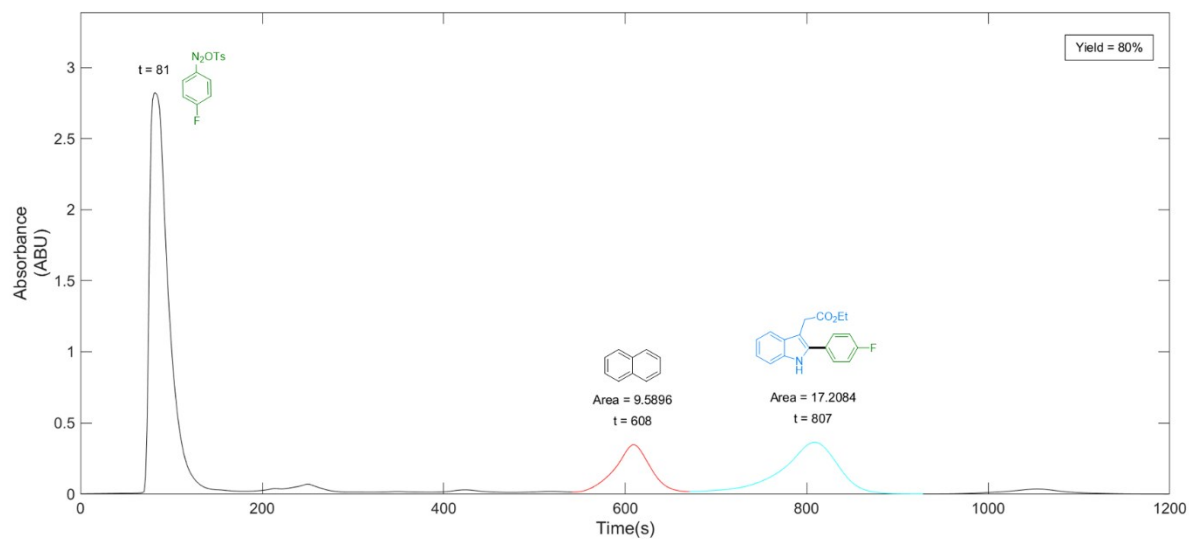

## 6. NMR spectra

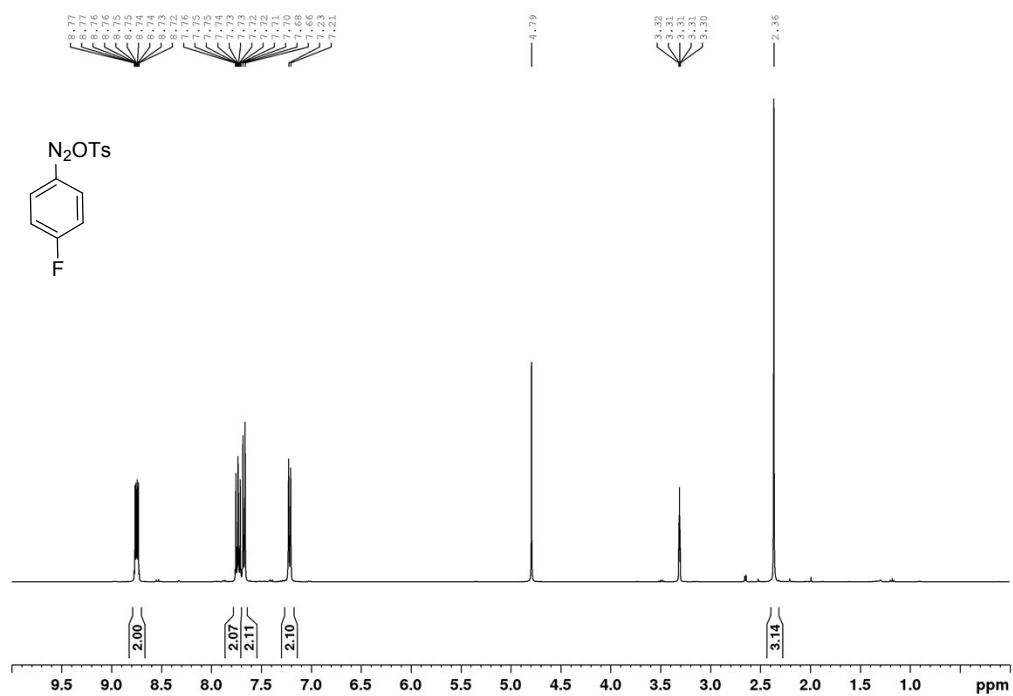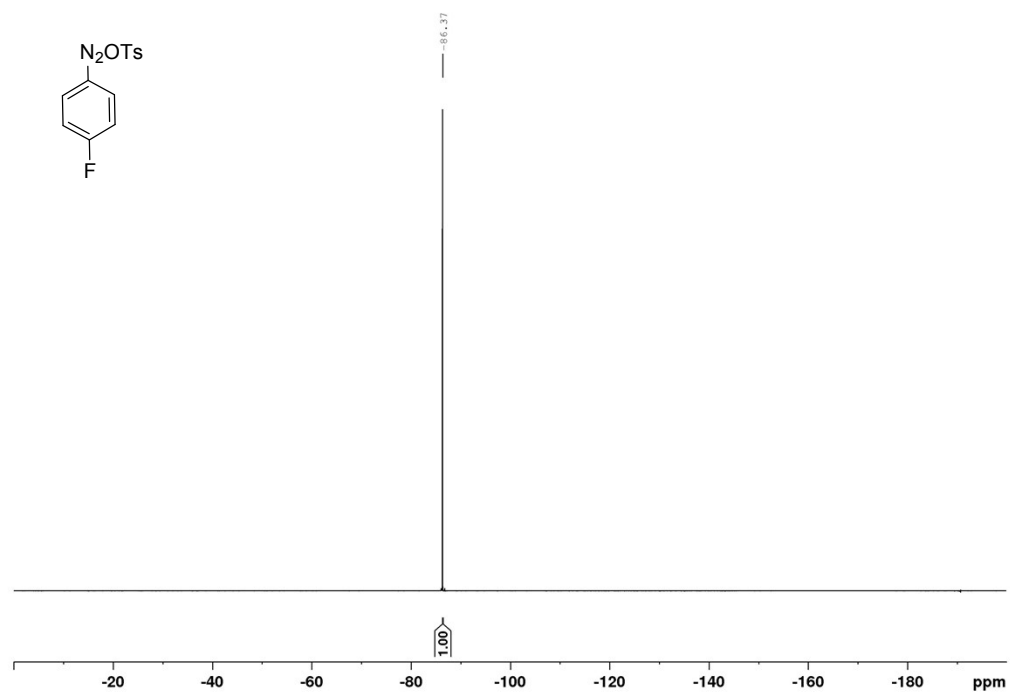

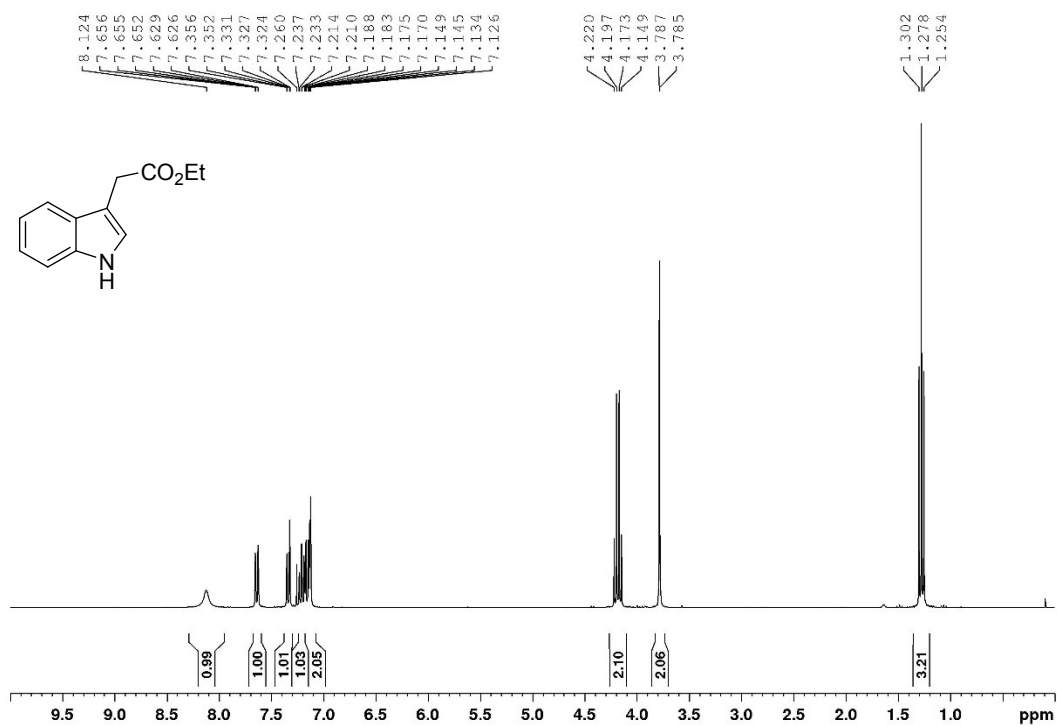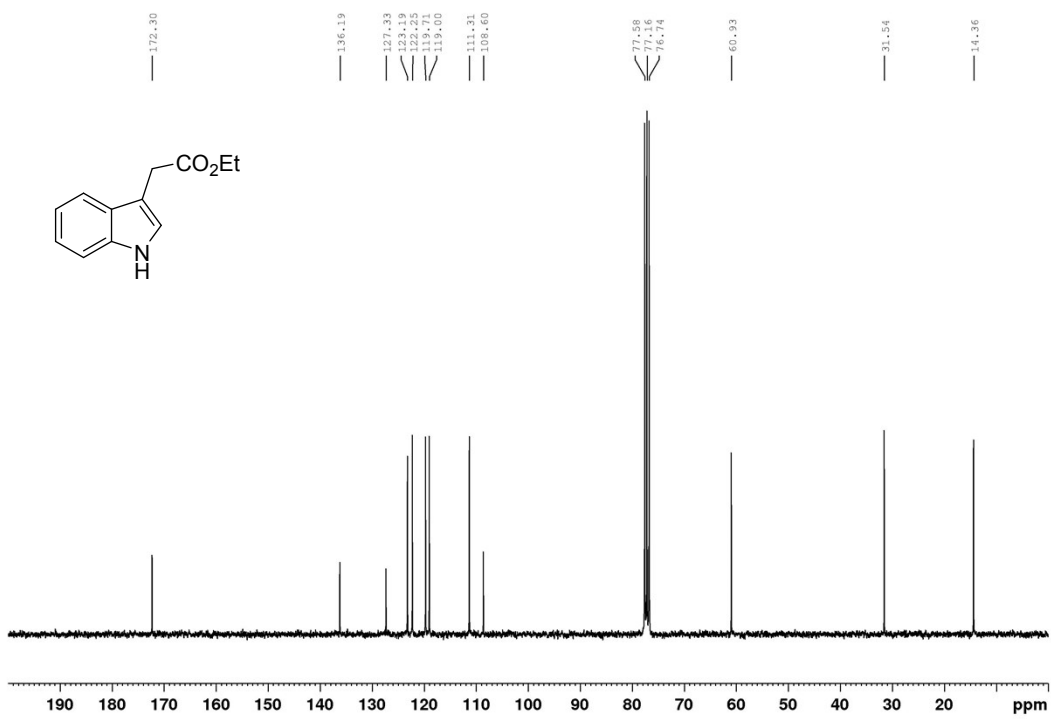

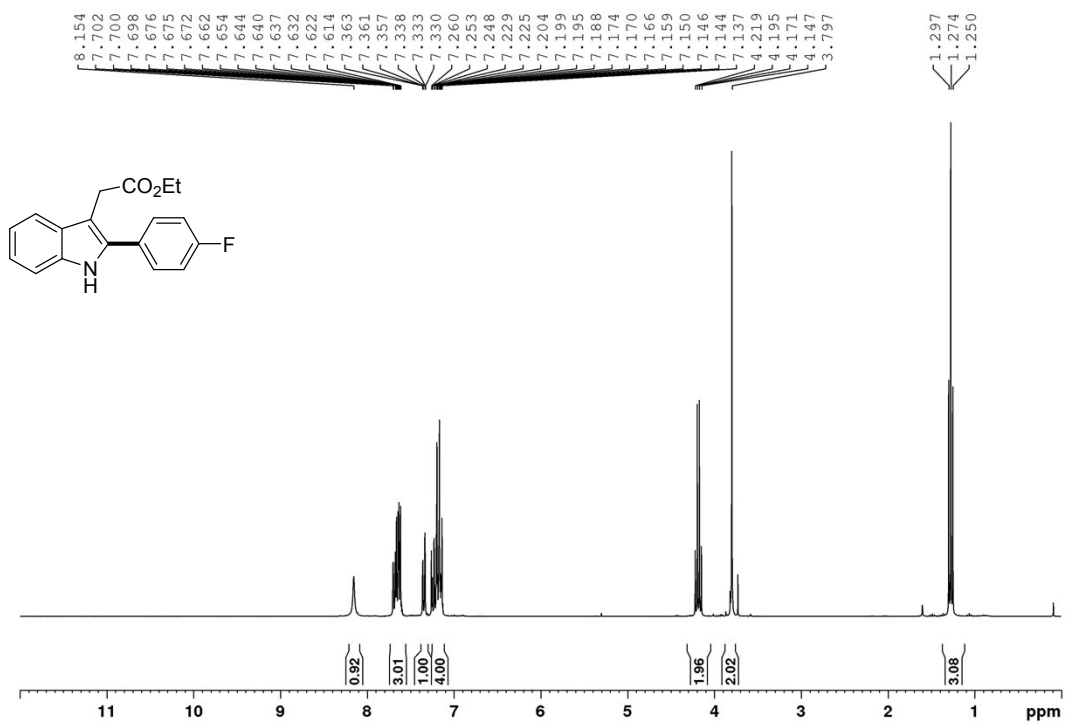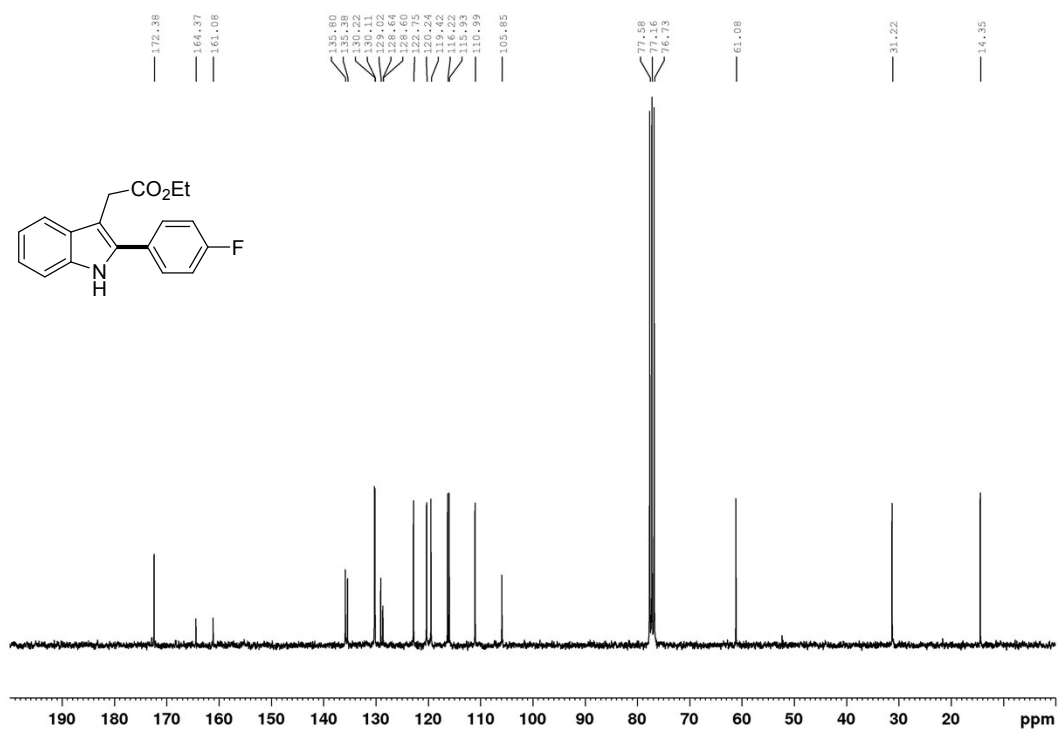

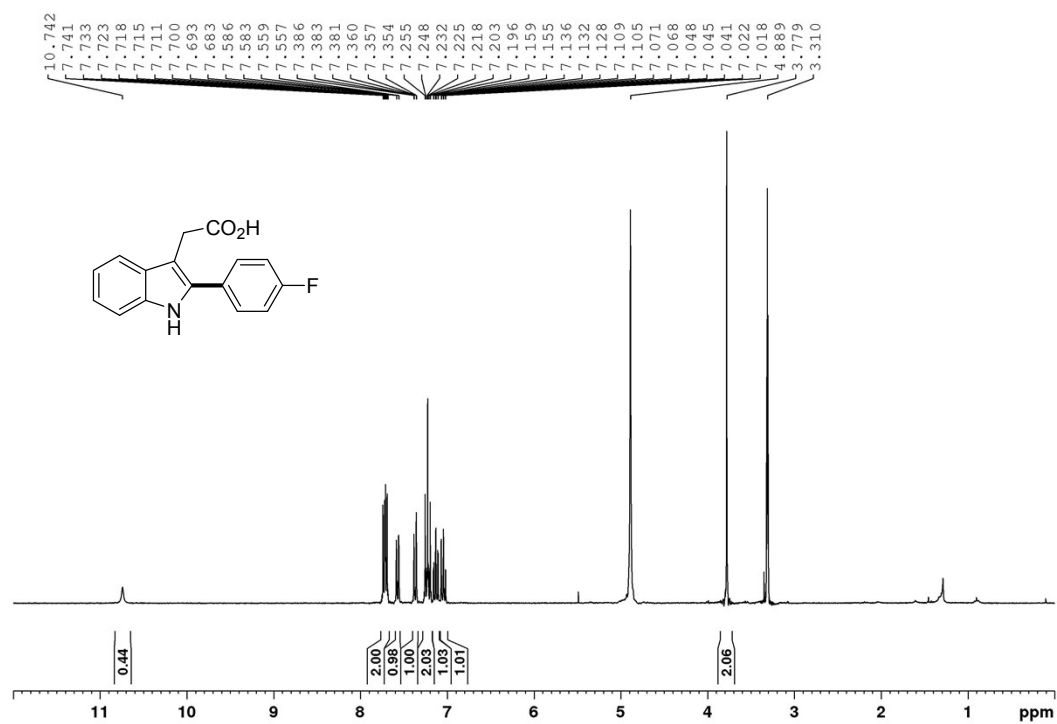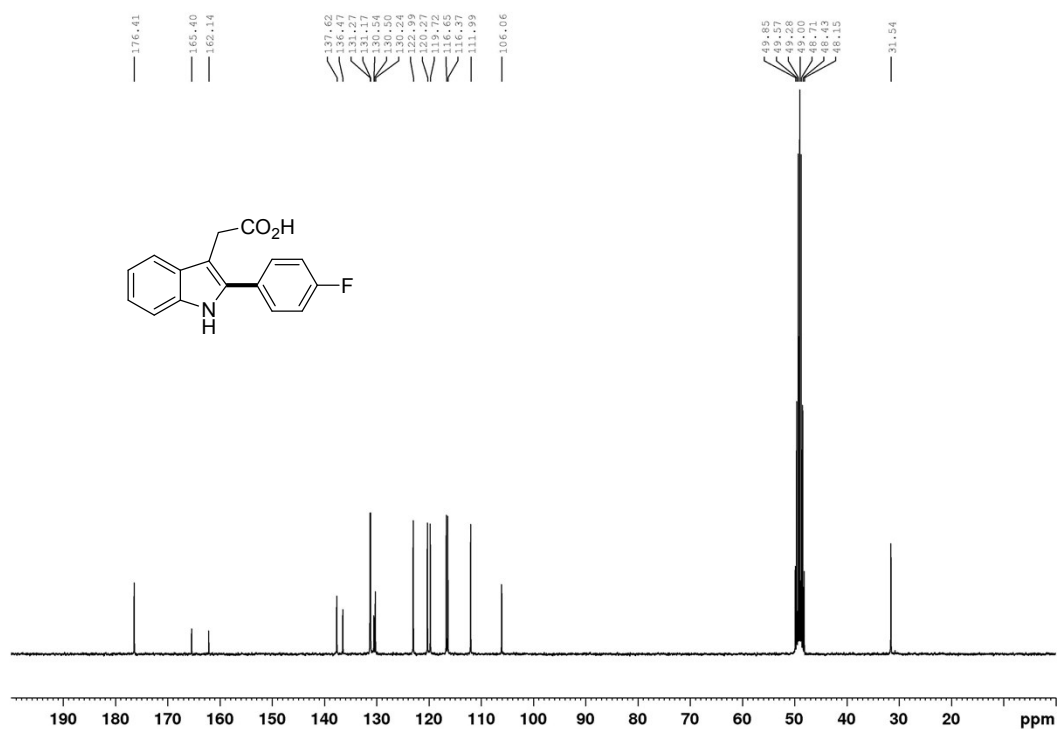



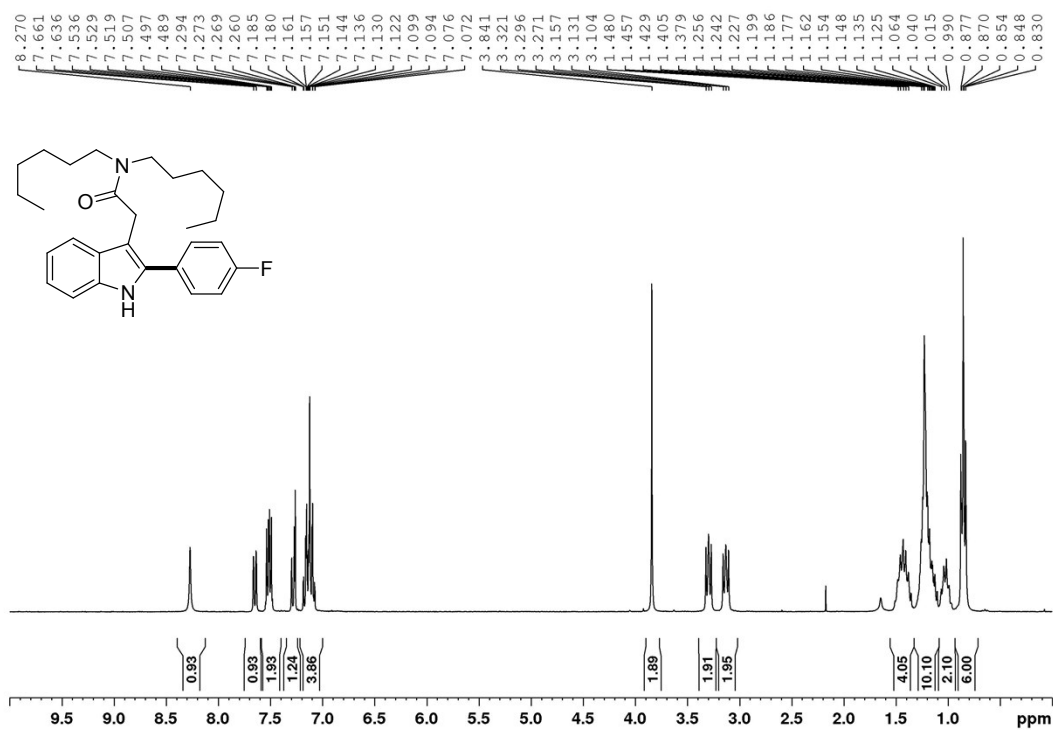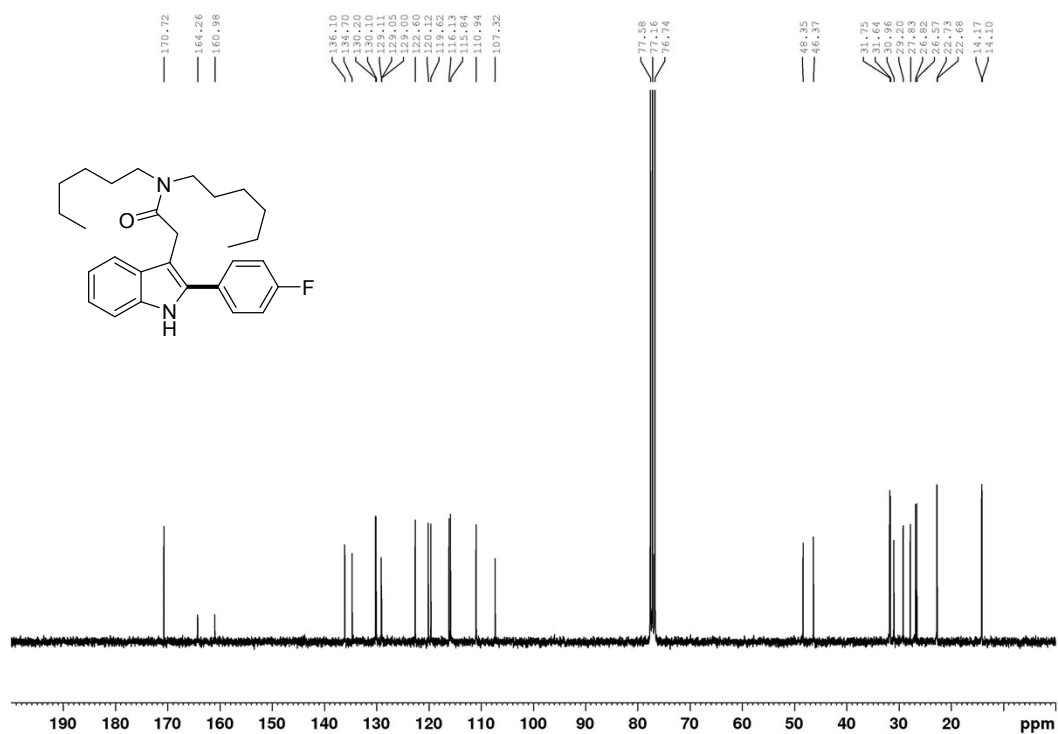

## 6. References

1. D. Cortés-Borda, K. V. Kutonova, C. Jamet, M. E. Trusova, F. Zammattio, C. Truchet, M. Rodriguez-Zubiri and F.-X. Felpin, *Org. Process Res. Dev.*, 2016, **20**, 1979-1987.
2. D. Cortés-Borda, E. Wimmer, B. Gouilleux, E. Barré, N. Oger, L. Goulamaly, L. Peault, B. Charrier, C. Truchet, P. Giraudeau, M. Rodriguez-Zubiri, E. Le Grogneec and F.-X. Felpin, *J. Org. Chem.*, 2018, **83**, 14286-14299.
